# Supplementary material
Source: publisher figshare collection journal article supplement (https://acs.figshare.com/ndownloader/files/3970777)
Supplement: Supplementary file 1 [file 3970777]

## Supporting Informations

# Innovative Multifunctional Silk Fibroin and Hydrotalcite Nanocomposites: a Synergic Effect of the Components

*Tamara Posati<sup>a\*</sup>, Valentina Benfenati<sup>b\*</sup>, Anna Sagnella<sup>b</sup>, Assunta Pistone<sup>b</sup>, Morena Nocchetti<sup>c</sup>,  
Anna Donnadio<sup>c</sup>, Giampiero Ruani<sup>d</sup>, Roberto Zamboni<sup>b</sup> and Michele Muccini<sup>d\*</sup>*

<sup>a</sup> Laboratory MIST E-R, Via P. Gobetti 101, I-40129 Bologna, Italy.

<sup>b</sup> Consiglio Nazionale delle Ricerche, Istituto per la Sintesi Organica e la Fotoreattività (CNR-ISO), Via P. Gobetti 101, I-40129 Bologna, Italy.

<sup>c</sup> Dipartimento di Chimica, Università di Perugia, Via Elce di Sotto 10, 06123 Perugia, Italy.

<sup>d</sup> Consiglio Nazionale delle Ricerche, Istituto per lo Studio dei Materiali Nanostrutturati (CNR-ISMN), Via P. Gobetti 101, I-40129 Bologna, Italy.

Figures

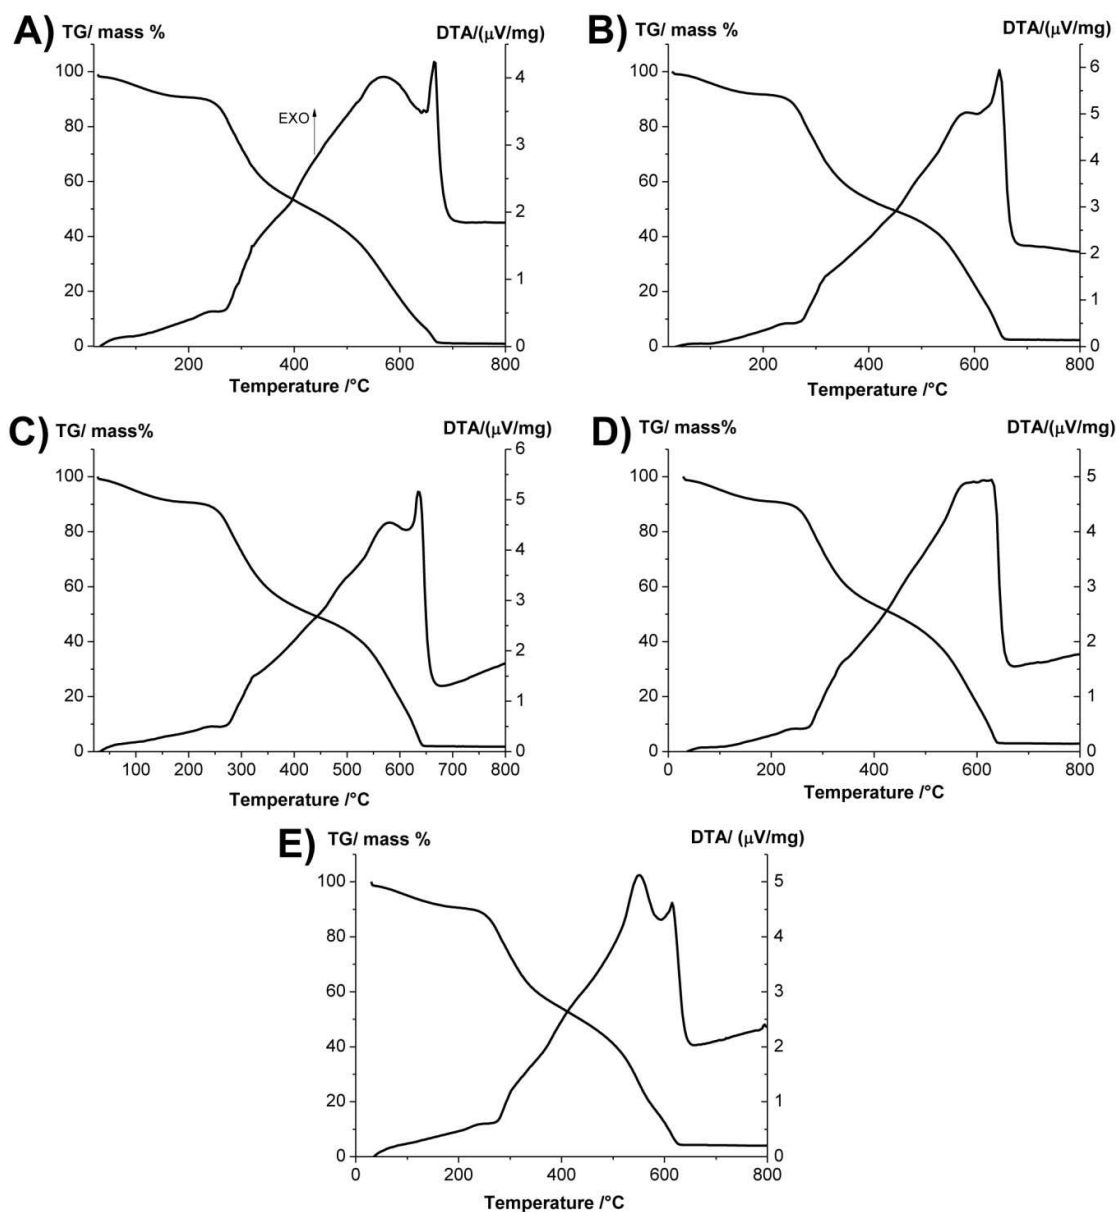

**Figure S1.** TG/DTA curves of samples SF (A), SF-HTlc0.6 (B), SF-HTlc1.2 (C), SF-HTlc1.8 (D) and SF-HTlc3.6 (E). (Operative conditions: heating rate: 10  $^{\circ}\text{C}/\text{min}$ , air flow).

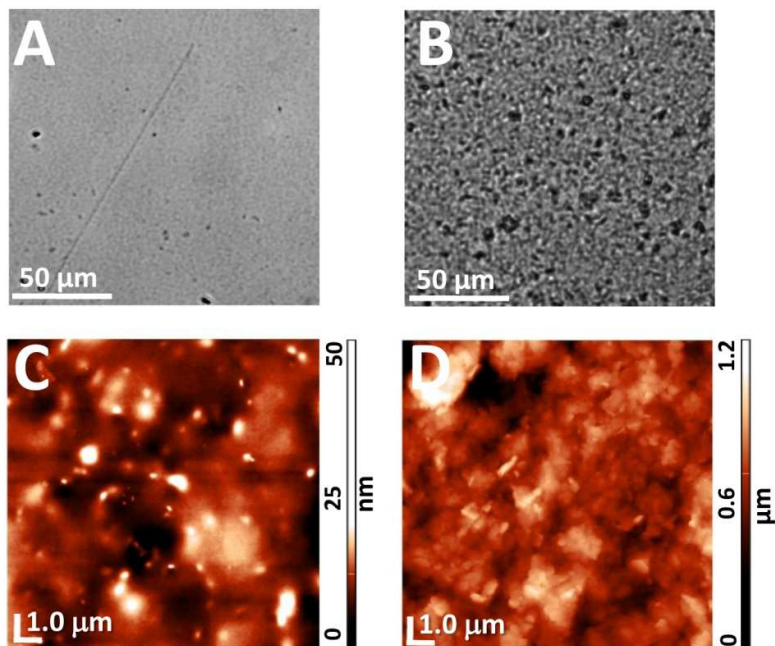

**Figure S2.** Optical micrographs of: SF-HTlc1.8 hybrid film (A) and ZnAl-HTlc (B). AFM topographical images of: SF-HTlc1.8 hybrid film (RMS~4.5 nm) (C) and ZnAl-HTlc (RMS~130 nm) (D). The ZnAl-HTlc film was fabricated using the same concentration of nanoparticles contained in the SF-HTlc0.6 hybrid film.

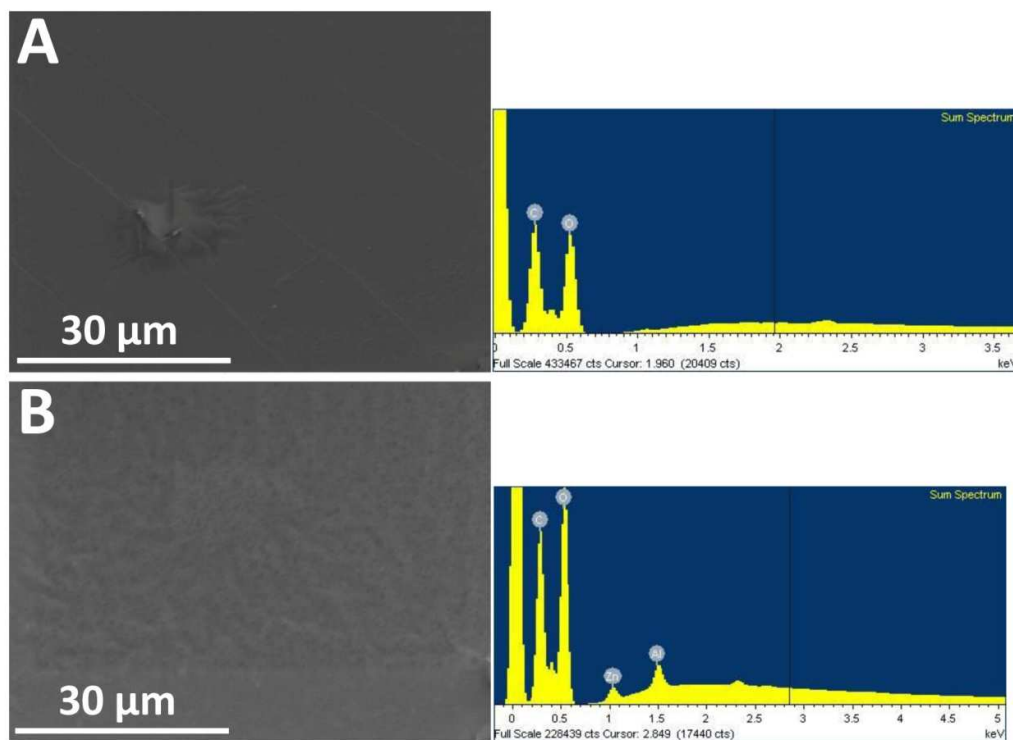

**Figure S3.** SEM images and EDS pattern of SF (A) and SF-HTlc3.6 (B) samples.

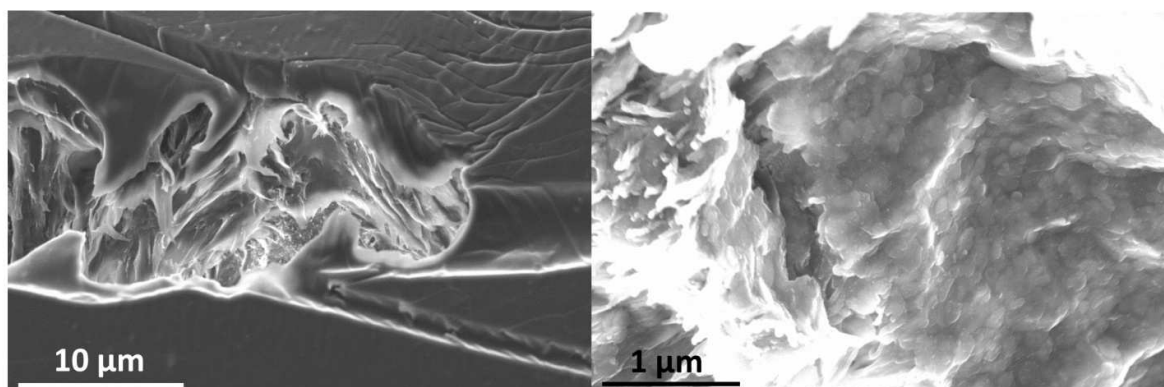

**Figure S4.** SEM images of the section of the sample SF-HTlc3.6 at different magnifications.

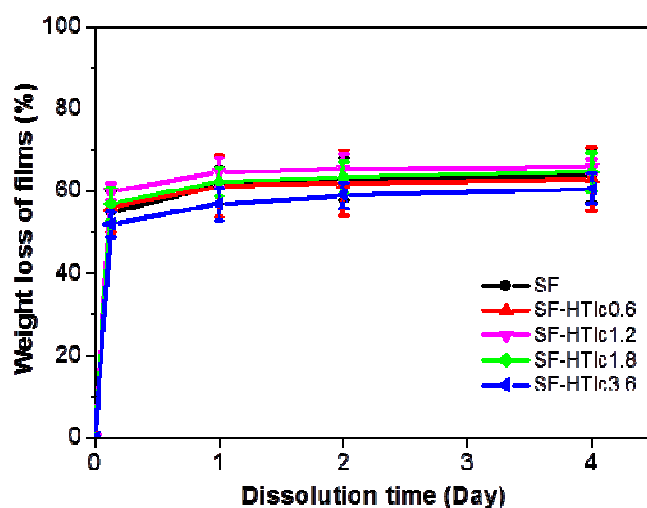

**Figure S5:** Dissolution profiles of pure SF film (black line) and SF-HTlc nanocomposites in phosphate buffered saline (PBS), pH 7.4. Films were incubated at 37 °C in 3 mL of PBS solution. Each solution contained an approximately equivalent mass ( $50 \pm 2$  mg) of silk films (thickness  $\sim 60$   $\mu\text{m}$ ). Solutions were replenished with PBS and collected daily. At designated time points (3 h, 1, 2 and 4 days), groups of samples were rinsed in distilled water and prepared for mass balance. Samples were dehydrated in an oven at 50°C for 2 h. Following removal from the oven, the samples were weighed and returned to a new solution with fresh PBS. Percent weight loss over time was determined. Each experiment was performed in triplicate. The pure SF film was taken as the reference.

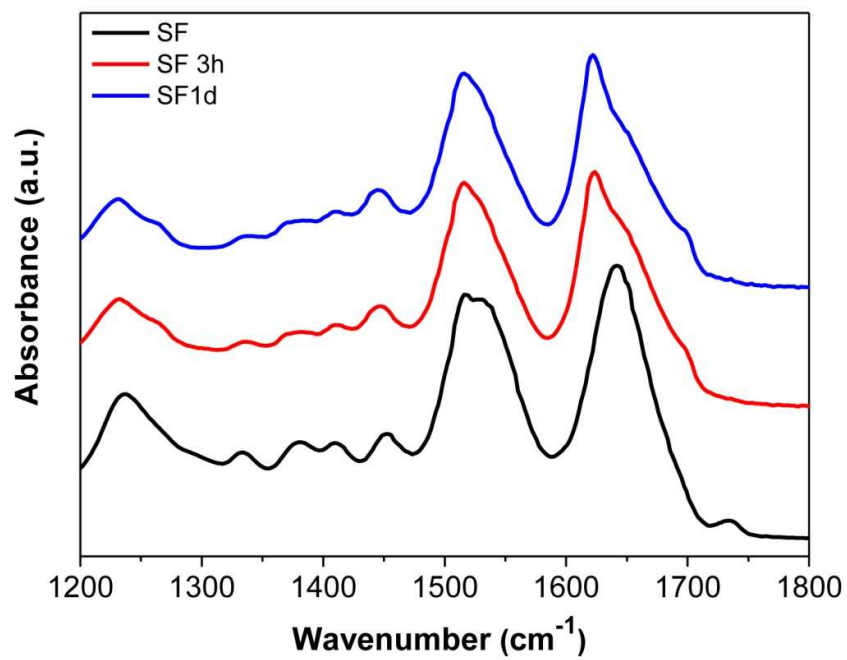

**Figure S6.** FT-IR spectra of SF film before (black line), after 3 h (red line) and after 1 day of incubation in acidic medium, recorded in the 1200-1800  $\text{cm}^{-1}$  region.
